# Supplementary material
Source: PubMed Central journal article supplement (PMC6450794)
Supplement: supp_7.2.E210_2018-0202-1-at.pdf [file supp_7.2.E210_2018-0202-1-at.pdf]

**Appendix 1 (as supplied by the authors): Sociodemographic characteristics of the 400,000 members of the Leger Web-Panel**

| Variable                             | %  |
|--------------------------------------|----|
| Age (years)                          |    |
| From 18 to 24                        | 10 |
| From 25 to 34                        | 23 |
| From 35 to 44                        | 23 |
| From 45 to 54                        | 16 |
| From 55 to 64                        | 15 |
| 65 or more                           | 13 |
| Gender                               |    |
| Male                                 | 45 |
| Female                               | 55 |
| Level of education                   |    |
| High school or professional training | 24 |
| Some University                      | 32 |
| University degree                    | 34 |
| Total family income (\$Can)          |    |
| 19,999 or less                       | 11 |
| 20,000 to 39,999                     | 20 |
| 40,000 to 59,999                     | 18 |
| 60 000 to 79,999                     | 14 |
| 80,000 to 99,999                     | 10 |
| 100,000 to 119,999                   | 12 |
| 119,999 or more                      | 15 |
| Province                             |    |
| ATLANTIC                             | 7  |
| QC                                   | 25 |
| ON                                   | 40 |
| MB/SK                                | 5  |
| AB                                   | 12 |
| BC                                   | 11 |

Source: Leger Panel Book, 2016, available online:

[http://leger360.com/admin/legerweb/PanelBook\\_Canada\\_EN\\_2016.pdf](http://leger360.com/admin/legerweb/PanelBook_Canada_EN_2016.pdf)
