# Supplementary material
Source: PubMed Central journal article supplement (PMC6450794)
Supplement: supp_7.2.E210_2018-0202-3-at.pdf [file supp_7.2.E210_2018-0202-3-at.pdf]

**Appendix 3 (as supplied by the authors): Univariate ANOVA results for the outcomes average SDM score and the five SDM outcomes, on the demographic characteristics**

|                                                    | Average SDM score |                  | #1 Choice discussed? |              | #2 Advantages/<br>disadvantages presented? |                  | #3 Asked about opinion<br>or preferences? |              | #4 Asked about preferred<br>option? |              | #5 match between<br>preferred and actual level<br>of participation? |              |
|----------------------------------------------------|-------------------|------------------|----------------------|--------------|--------------------------------------------|------------------|-------------------------------------------|--------------|-------------------------------------|--------------|---------------------------------------------------------------------|--------------|
|                                                    | mean (SE)         | P                | mean (SE)            | P            | mean (SE)                                  | P                | mean (SE)                                 | P            | mean (SE)                           | P            | mean (SE)                                                           | P            |
| <b>Age (years)</b>                                 |                   | <b>&lt;0.001</b> |                      | <b>0.004</b> |                                            | <b>&lt;0.001</b> |                                           | <b>0.004</b> |                                     | <b>0.02</b>  |                                                                     | <b>0.03</b>  |
| From 18 to 24 (ref)                                | 2.9 (0.2)         |                  | 2.8 (0.2)            |              | 3.1 (0.2)                                  |                  | 2.7 (0.3)                                 |              | 2.7 (0.3)                           |              | 3.1 (0.2)                                                           |              |
| From 25 to 34                                      | 2.4 (0.1) *       |                  | 2.5 (0.1)            |              | 2.5 (0.1) *                                |                  | 2.2 (0.1)                                 |              | 2.3 (0.1)                           |              | 2.7 (0.1)                                                           |              |
| From 35 to 44                                      | 2.2 (0.1) **      |                  | 2.3 (0.2) *          |              | 2.2 (0.1) ***                              |                  | 2.0 (0.1) *                               |              | 2.1 (0.1) *                         |              | 2.4 (0.2) **                                                        |              |
| From 45 to 54                                      | 2.3 (0.1) **      |                  | 2.3 (0.1) *          |              | 2.3 (0.1) ***                              |                  | 2.3 (0.1)                                 |              | 2.1 (0.1) *                         |              | 2.5 (0.1) *                                                         |              |
| From 55 to 64                                      | 2.2 (0.1) ***     |                  | 2.2 (0.2) **         |              | 2.2 (0.1) ***                              |                  | 2.1 (0.1) *                               |              | 2.1 (0.1) *                         |              | 2.4 (0.1) **                                                        |              |
| 65 or more                                         | 2.0 (0.1) ***     |                  | 2.0 (0.1) ***        |              | 2.0 (0.1) ***                              |                  | 1.8 (0.1) **                              |              | 1.9 (0.1) **                        |              | 2.4 (0.1) **                                                        |              |
| <b>Gender</b>                                      |                   | <b>1</b>         |                      | <b>0.4</b>   |                                            | <b>1</b>         |                                           | <b>0.5</b>   |                                     | <b>0.9</b>   |                                                                     | <b>0.8</b>   |
| Male (ref)                                         | 2.3 (0.1)         |                  | 2.2 (0.1)            |              | 2.8 (0.1)                                  |                  | 2.1 (0.07)                                |              | 2.1 (0.1)                           |              | 2.5 (0.1)                                                           |              |
| Female                                             | 2.3 (0.1)         |                  | 2.3 (0.1)            |              | 2.8 (0.1)                                  |                  | 2.1 (0.07)                                |              | 2.1 (0.017)                         |              | 2.5 (0.1)                                                           |              |
| <b>Member of household<br/>receiving home care</b> |                   | <b>&lt;0.001</b> |                      | <b>0.005</b> |                                            | <b>0.002</b>     |                                           | <b>0.001</b> |                                     | <b>0.001</b> |                                                                     | <b>0.005</b> |
| No (ref)                                           | 2.2 (0.1)         |                  | 2.2 (0.1)            |              | 2.2 (0.015)                                |                  | 2.1 (0.1)                                 |              | 2.1 (0.1)                           |              | 2.5 (0.1)                                                           |              |
| Yes                                                | 2.8 (0.2) ***     |                  | 2.7 (0.2) **         |              | 2.9 (0.2) **                               |                  | 2.7 (0.2) **                              |              | 2.7 (0.2) ***                       |              | 3.0 (0.2) **                                                        |              |
| <b>Geographical area</b>                           |                   | <b>0.005</b>     |                      | <b>0.002</b> |                                            | <b>0.01</b>      |                                           | <b>0.006</b> |                                     | <b>0.02</b>  |                                                                     | <b>0.2</b>   |
| Urban (ref)                                        | 2.4 (0.1)         |                  | 2.4 (0.1)            |              | 2.4 (0.1)                                  |                  | 2.2 (0.1)                                 |              | 2.2 (0.1)                           |              | 2.6 (0.1)                                                           |              |
| Suburb                                             | 2.2 (0.1)         |                  | 2.2 (0.1)            |              | 2.3 (0.1)                                  |                  | 2.1 (0.1)                                 |              | 2.1 (0.1)                           |              | 2.5 (0.1)                                                           |              |
| Rural                                              | 2.0 (0.1) **      |                  | 1.9 (0.1) ***        |              | 2.0 (0.1) **                               |                  | 1.8 (0.1) **                              |              | 1.9 (0.1) **                        |              | 2.4 (0.1)                                                           |              |
| <b>Level of education</b>                          |                   | <b>0.8</b>       |                      | <b>0.4</b>   |                                            | <b>0.4</b>       |                                           | <b>0.6</b>   |                                     | <b>0.8</b>   |                                                                     | <b>0.8</b>   |
| Elementary (ref)                                   | 2.5 (0.4)         |                  | 2.1 (0.6)            |              | 2.6 (0.4)                                  |                  | 2.6 (0.4)                                 |              | 2.5 (0.3)                           |              | 2.7 (0.4)                                                           |              |
| High school                                        | 2.2 (0.1)         |                  | 2.2 (0.1)            |              | 2.1 (0.1)                                  |                  | 2.0 (0.1)                                 |              | 2.0 (0.1)                           |              | 2.5 (0.1)                                                           |              |
| College                                            | 2.3 (0.1)         |                  | 2.3 (0.1)            |              | 2.3 (0.1)                                  |                  | 2.1 (0.1)                                 |              | 2.2 (0.1)                           |              | 2.6 (0.1)                                                           |              |
| University certificate                             | 2.4 (0.1)         |                  | 2.5 (0.2)            |              | 2.5 (0.2)                                  |                  | 2.0 (0.2)                                 |              | 2.2 (0.2)                           |              | 2.6 (0.2)                                                           |              |
| University 1st cycle                               | 2.2 (0.1)         |                  | 2.2 (0.1)            |              | 2.2 (0.1)                                  |                  | 2.2 (0.1)                                 |              | 2.2 (0.1)                           |              | 2.5 (0.1)                                                           |              |
| University 2nd cycle                               | 2.3 (0.2)         |                  | 2.4 (0.2)            |              | 2.4 (0.2)                                  |                  | 2.2 (0.2)                                 |              | 2.1 (0.2)                           |              | 2.5 (0.2)                                                           |              |
| University 3rd cycle                               | 2.5 (0.3)         |                  | 2.7 (0.4)            |              | 2.4 (0.4)                                  |                  | 2.4 (0.4)                                 |              | 2.2 (0.4)                           |              | 2.9 (0.3)                                                           |              |
| <b>Occupation</b>                                  |                   | <b>0.3</b>       |                      | <b>0.1</b>   |                                            | <b>0.2</b>       |                                           | <b>0.5</b>   |                                     | <b>0.5</b>   |                                                                     | <b>0.5</b>   |
| full-time student (ref)                            | 2.6 (0.3)         |                  | 2.8 (0.3)            |              | 2.7 (0.3)                                  |                  | 2.3 (0.3)                                 |              | 2.5 (0.3)                           |              | 2.6 (0.3)                                                           |              |
| not worker                                         | 2.1 (0.2)         |                  | 2.2 (0.2)            |              | 2.1 (0.2)                                  |                  | 2.0 (0.2)                                 |              | 2.0 (0.2)                           |              | 2.3 (0.2)                                                           |              |
| worker                                             | 2.3 (0.1)         |                  | 2.3 (0.06)           |              | 2.3 (0.1)                                  |                  | 2.1 (0.2)                                 |              | 2.1 (0.1)                           |              | 2.5 (0.1)                                                           |              |

|                                     |             |             |             |           |             |              |     |  |             |
|-------------------------------------|-------------|-------------|-------------|-----------|-------------|--------------|-----|--|-------------|
| <b>Total family income (\$Can)</b>  |             | 0.6         | 0.6         | 0.4       | 0.5         | 0.9          | 0.7 |  |             |
| 19,999 or less (ref)                | 2.3 (0.2)   | 2.3 (0.2)   | 2.3 (0.2)   | 2.0 (0.2) | 2.2 (0.2)   | 2.6 (0.2)    |     |  |             |
| 20,000 to 39,999                    | 2.2 (0.1)   | 2.2 (0.2)   | 2.2 (0.2)   | 2.0 (0.2) | 2.1 (0.2)   | 2.5 (0.2)    |     |  |             |
| 40,000 to 59,999                    | 2.3 (0.1)   | 2.3 (0.1)   | 2.2 (0.1)   | 2.2 (0.1) | 2.2 (0.1)   | 2.5 (0.1)    |     |  |             |
| 60 000 to 79,999                    | 2.2 (0.1)   | 2.3 (0.1)   | 2.3 (0.1)   | 2.0 (0.1) | 2.0 (0.1)   | 2.4 (0.1)    |     |  |             |
| 80,000 to 99,999                    | 2.2 (0.1)   | 2.2 (0.1)   | 2.3 (0.1)   | 2.0 (0.1) | 2.1 (0.2)   | 2.5 (0.1)    |     |  |             |
| 100,000 to 124,999                  | 2.3 (0.1)   | 2.3 (0.2)   | 2.3 (0.6)   | 2.1 (0.2) | 2.1 (0.2)   | 2.6 (0.1)    |     |  |             |
| 125,000 to 149,999                  | 2.1 (0.1)   | 2.2 (0.2)   | 2.1 (0.2)   | 2.0 (0.2) | 2.1 (0.2)   | 2.3 (0.2)    |     |  |             |
| 150,000 or more                     | 2.6 (0.1)   | 2.5 (0.2)   | 2.6 (0.2)   | 2.5 (0.2) | 2.4 (0.2)   | 2.8 (0.2)    |     |  |             |
| prefers not to answer               | 2.1 (0.2)   | 2.0 (0.2)   | 2.0 (0.2)   | 2.1 (0.2) | 2.0 (0.2)   | 2.5 (0.1)    |     |  |             |
| <b>Province</b>                     |             | 0.4         | 0.7         | 0.7       | 0.4         | 0.1          |     |  | <b>0.03</b> |
| ATLANTIC (ref)                      | 2.4 (0.2)   | 2.3 (0.2)   | 2.4 (0.2)   | 2.4 (0.2) | 2.3 (0.2)   | 2.9 (0.2)    |     |  |             |
| QC                                  | 2.2 (0.1)   | 2.4 (0.1)   | 2.2 (0.1)   | 2.0 (0.1) | 1.9 (0.1)   | 2.3 (0.1) ** |     |  |             |
| ON                                  | 2.2 (0.1)   | 2.2 (0.1)   | 2.3 (0.1)   | 2.0 (0.1) | 2.1 (0.1)   | 2.5 (0.1)*   |     |  |             |
| MB/SK                               | 2.4 (0.2)   | 2.3 (0.2)   | 2.4 (0.2)   | 2.2 (0.2) | 2.2 (0.2)   | 2.7 (0.2)    |     |  |             |
| AB                                  | 2.2 (0.2)   | 2.2 (0.2)   | 2.2 (0.2)   | 2.0 (0.2) | 2.3 (0.2)   | 2.6 (0.2)    |     |  |             |
| BC                                  | 2.4 (0.2)   | 2.3 (0.1)   | 2.5 (0.2)   | 2.3 (0.2) | 2.4 (0.2)   | 2.7 (0.2)    |     |  |             |
| <b>First language</b>               |             | 0.8         | <b>0.04</b> | 0.9       | 1           | 0.3          |     |  | <b>0.05</b> |
| French (ref)                        | 2.3 (0.1)   | 2.5 (0.1)   | 2.3 (0.1)   | 2.1 (0.1) | 2.0 (0.1)   | 2.4 (0.1)    |     |  |             |
| English                             | 2.3 (0.1)   | 2.2 (0.1) * | 2.3 (0.1)   | 2.1 (0.1) | 2.2 (0.1)   | 2.6 (0.1) *  |     |  |             |
| Other                               | 2.2 (0.1)   | 2.2 (0.2)   | 2.2 (0.2)   | 2.1 (0.1) | 2.1 (0.1)   | 2.4 (0.1)    |     |  |             |
| <b>Civil status</b>                 |             | 0.1         | 0.09        | 0.08      | 0.5         | 0.1          |     |  | 0.2         |
| Married or Common-law partner (ref) | 2.2 (0.1)   | 2.2 (0.1)   | 2.2 (0.1)   | 2.1 (0.1) | 2.1 (0.1)   | 2.4 (0.1)    |     |  |             |
| Separated or Divorced               | 2.1 (0.2)   | 2.1 (0.2)   | 2.0 (0.2)   | 2.0 (0.2) | 2.0 (0.2)   | 2.6 (0.2)    |     |  |             |
| Single                              | 2.5 (0.1) * | 2.5 (0.1) * | 2.5 (0.1) * | 2.2 (0.1) | 2.4 (0.1) * | 2.7 (0.1)    |     |  |             |
| Widower                             | 2.3 (0.2)   | 2.2 (0.3)   | 2.3 (0.3)   | 2.1 (0.3) | 2.1 (0.3)   | 2.7 (0.2)    |     |  |             |
| <b>Ethnicity</b>                    |             | 1           | 0.7         | 0.8       | 0.7         | 0.9          |     |  | 0.2         |
| All except Caucasian (ref)          | 2.3 (0.1)   | 2.3 (0.1)   | 2.3 (0.1)   | 2.1 (0.1) | 2.2 (0.1)   | 2.4 (0.1)    |     |  |             |
| Caucasian                           | 2.3 (0.1)   | 2.3 (0.1)   | 2.26 (0.1)  | 2.1 (0.1) | 2.1 (0.1)   | 2.6 (0.1)    |     |  |             |

\* P < 0.05; \*\* P < 0.01; \*\*\*P < 0.001 for the significance of the corresponding beta coefficients

*SDM Shared Decision Making, SE Standard Error, QC Quebec, ON Ontario, MB Manitoba, SK Saskatchewan, AB Alberta, BC British Columbia, Ref Referenc*  
*Average SDM score is calculated as the mean of the scores of the 5 SDM item, each SDM item is scored from 1 (never) to 5 (always).*
